# Supplementary material
Source: Springer Nature journal article supplement (https://publikationen.ub.uni-frankfurt.de/opus4/files/35269/13104_2014_3224_MOESM7_ESM.pdf)
Supplement: MOESM7 [file 13104_2014_3224_MOESM7_ESM.pdf]

**Suppl. Table 6A.** Influence of the ABCB1 inhibitor verapamil (10 $\mu$ M) on the sensitivity of ABCB1-expressing melanoma cells to PLX4720 or the cytotoxic ABCB1 substrate vincristine. Concentrations that reduce the cell viability by 50% (IC<sub>50</sub>) were determined after a five day incubation period by MTT assay.

|                                                                 | IC <sub>50</sub> (ng/ml) | cell viability in the presence of verapamil alone <sup>1</sup> | IC <sub>50</sub> in the presence of verapamil | fold sensitisation <sup>2</sup> |
|-----------------------------------------------------------------|--------------------------|----------------------------------------------------------------|-----------------------------------------------|---------------------------------|
| <b>Colo-679<sup>r</sup>VCR<sup>10</sup></b>                     |                          |                                                                |                                               |                                 |
| vincristine                                                     | 81 $\pm$ 9               | 92 $\pm$ 16                                                    | 3.3 $\pm$ 0.6 <sup>3</sup>                    | 24.5                            |
| <b>IGR-39<sup>r</sup>PLX4720<sup>20</sup><math>\mu</math>M</b>  |                          |                                                                |                                               |                                 |
| PLX4720                                                         | 24 $\pm$ 0.5             | 90 $\pm$ 8                                                     | 28 $\pm$ 1                                    | 0.9                             |
| vincristine                                                     | 1.6 $\pm$ 0.1            | 90 $\pm$ 8                                                     | 0.25 $\pm$ 0.01 <sup>3</sup>                  | 6.4                             |
| <b>MelHO<sup>r</sup>VCR<sup>20</sup></b>                        |                          |                                                                |                                               |                                 |
| vincristine                                                     | 96 $\pm$ 53              | 88 $\pm$ 13                                                    | 2.1 $\pm$ 0.4 <sup>3</sup>                    | 45.7                            |
| <b>RVH-421<sup>r</sup>PLX4720<sup>20</sup><math>\mu</math>M</b> |                          |                                                                |                                               |                                 |
| PLX4720                                                         | 38 $\pm$ 5               | 93 $\pm$ 5                                                     | 35 $\pm$ 1                                    | 1.1                             |
| vincristine                                                     | 0.76 $\pm$ 0.02          | 93 $\pm$ 5                                                     | 0.17 $\pm$ 0.02 <sup>3</sup>                  | 4.5                             |

<sup>1</sup> values are % relative to non-treated control

<sup>2</sup> IC<sub>50</sub> drug/ IC<sub>50</sub> drug in the presence of verapamil

<sup>3</sup> p < 0.05 relative to vincristine or PLX4720 in the absence of verapamil

**Suppl. Table 6B.** Influence of the ABCC1 inhibitor verapamil (10 $\mu$ M) on the sensitivity of ABCC1-expressing melanoma cells to PLX4032, PLX4720, or the cytotoxic ABCC1 substrate vincristine. Concentrations that reduce the cell viability by 50% (IC<sub>50</sub>) were determined after a five day incubation period by MTT assay.

|                                                                | IC <sub>50</sub> (ng/ml) | cell viability in the presence of verapamil alone <sup>1</sup> | IC <sub>50</sub> in the presence of verapamil | fold sensitisation <sup>2</sup> |
|----------------------------------------------------------------|--------------------------|----------------------------------------------------------------|-----------------------------------------------|---------------------------------|
| <b>IGR<sup>r</sup>VCR<sup>10</sup></b>                         |                          |                                                                |                                               |                                 |
| vincristine                                                    | 9.0 $\pm$ 2.2            | 95 $\pm$ 18                                                    | 0.51 $\pm$ 0.06 <sup>3</sup>                  | 17.6                            |
| <b>IGR-39<sup>r</sup>PLX4032<sup>20</sup><math>\mu</math>M</b> |                          |                                                                |                                               |                                 |
| PLX4032                                                        | 9.9 $\pm$ 1.5            | 94 $\pm$ 7                                                     | 12.0 $\pm$ 1.0                                | 0.8                             |
| vincristine                                                    | 1.5 $\pm$ 0.1            | 94 $\pm$ 7                                                     | 0.11 $\pm$ 0.03 <sup>3</sup>                  | 13.6                            |
| <b>IGR-39<sup>r</sup>PLX4720<sup>20</sup><math>\mu</math>M</b> |                          |                                                                |                                               |                                 |
| PLX4720                                                        | 24 $\pm$ 0.5             | 90 $\pm$ 8                                                     | 28 $\pm$ 1                                    | 0.9                             |
| vincristine                                                    | 1.6 $\pm$ 0.1            | 90 $\pm$ 8                                                     | 0.25 $\pm$ 0.01 <sup>3</sup>                  | 6.4                             |

<sup>1</sup> values are % relative to non-treated control

<sup>2</sup> IC<sub>50</sub> drug/ IC<sub>50</sub> drug in the presence of verapamil

<sup>3</sup> p < 0.05 relative to vincristine, PLX4032, or PLX4720 in the absence of verapamil

**Suppl. Table 6C.** Influence of ABCG2 inhibitor fumitremorgin C (2.5 $\mu$ M) on the sensitivity of ABCG2-expressing melanoma cells to PLX4720 or the cytotoxic ABCG2 substrate mitoxantrone. Concentrations that reduce the cell viability by 50% (IC<sub>50</sub>) were determined after a five day incubation period by MTT assay.

|                                                                 | IC <sub>50</sub><br>(ng/ml) | cell viability in the<br>presence of<br>fumitremorgin C<br>alone <sup>1</sup> | IC <sub>50</sub> in the<br>presence of<br>fumitremorgin<br>C | fold<br>sensitisation <sup>2</sup> |
|-----------------------------------------------------------------|-----------------------------|-------------------------------------------------------------------------------|--------------------------------------------------------------|------------------------------------|
| <b>IGR<sup>r</sup>VCR<sup>10</sup></b>                          |                             |                                                                               |                                                              |                                    |
| mitoxantrone                                                    | 6.2 ± 1.5                   | 81 ± 12                                                                       | 1.6 ± 0.6 <sup>3</sup>                                       | 3.9                                |
| <b>MeIHO<sup>r</sup>PLX4720<sup>20</sup><math>\mu</math>M</b>   |                             |                                                                               |                                                              |                                    |
| PLX4720                                                         | 25 ± 7.4                    | 78 ± 15                                                                       | 23 ± 4.4                                                     | 1.1                                |
| mitoxantrone                                                    | 49 ± 3.5                    | 78 ± 15                                                                       | 18 ± 2.5 <sup>3</sup>                                        | 2.7                                |
| <b>RVH-421<sup>r</sup>MITOX<sup>20</sup></b>                    |                             |                                                                               |                                                              |                                    |
| mitoxantrone                                                    | 25 ± 4.8                    | 106 ± 10 <sup>4</sup>                                                         | 6.3 ± 1.8 <sup>5</sup>                                       | 4.0 <sup>6</sup>                   |
| <b>RVH-421<sup>r</sup>PLX4720<sup>20</sup><math>\mu</math>M</b> |                             |                                                                               |                                                              |                                    |
| PLX4720                                                         | 38 ± 4.7                    | 102 ± 9 <sup>4</sup>                                                          | 33 ± 8.0                                                     | 1.2 <sup>6</sup>                   |
| mitoxantrone                                                    | 174 ± 36                    | 102 ± 9 <sup>4</sup>                                                          | 29 ± 8.7 <sup>5</sup>                                        | 6.0 <sup>6</sup>                   |

<sup>1</sup> values are % relative to non-treated control

<sup>2</sup> IC<sub>50</sub> drug/ IC<sub>50</sub> drug in the presence of fumitremorgin C

<sup>3</sup> p < 0.05 relative to mitoxantrone or PLX4720 in the absence of fumitremorgin C

<sup>4</sup> WK-X-34 (1 $\mu$ M) was used as ABCG2 inhibitor because fumitremorgin C caused toxicity in this cell line

<sup>5</sup> p < 0.05 relative to mitoxantrone or PLX4720 in the absence of WK-X-34

<sup>6</sup> IC<sub>50</sub> drug/ IC<sub>50</sub> drug in the presence of WK-X-34
